# Supplementary material for: Analysis of the relationship between coexpression domains and chromatin 3D organization
Source: PubMed Central journal article supplement (PMC5612749; doi:10.1371/journal.pcbi.1005708), 2017-09-13

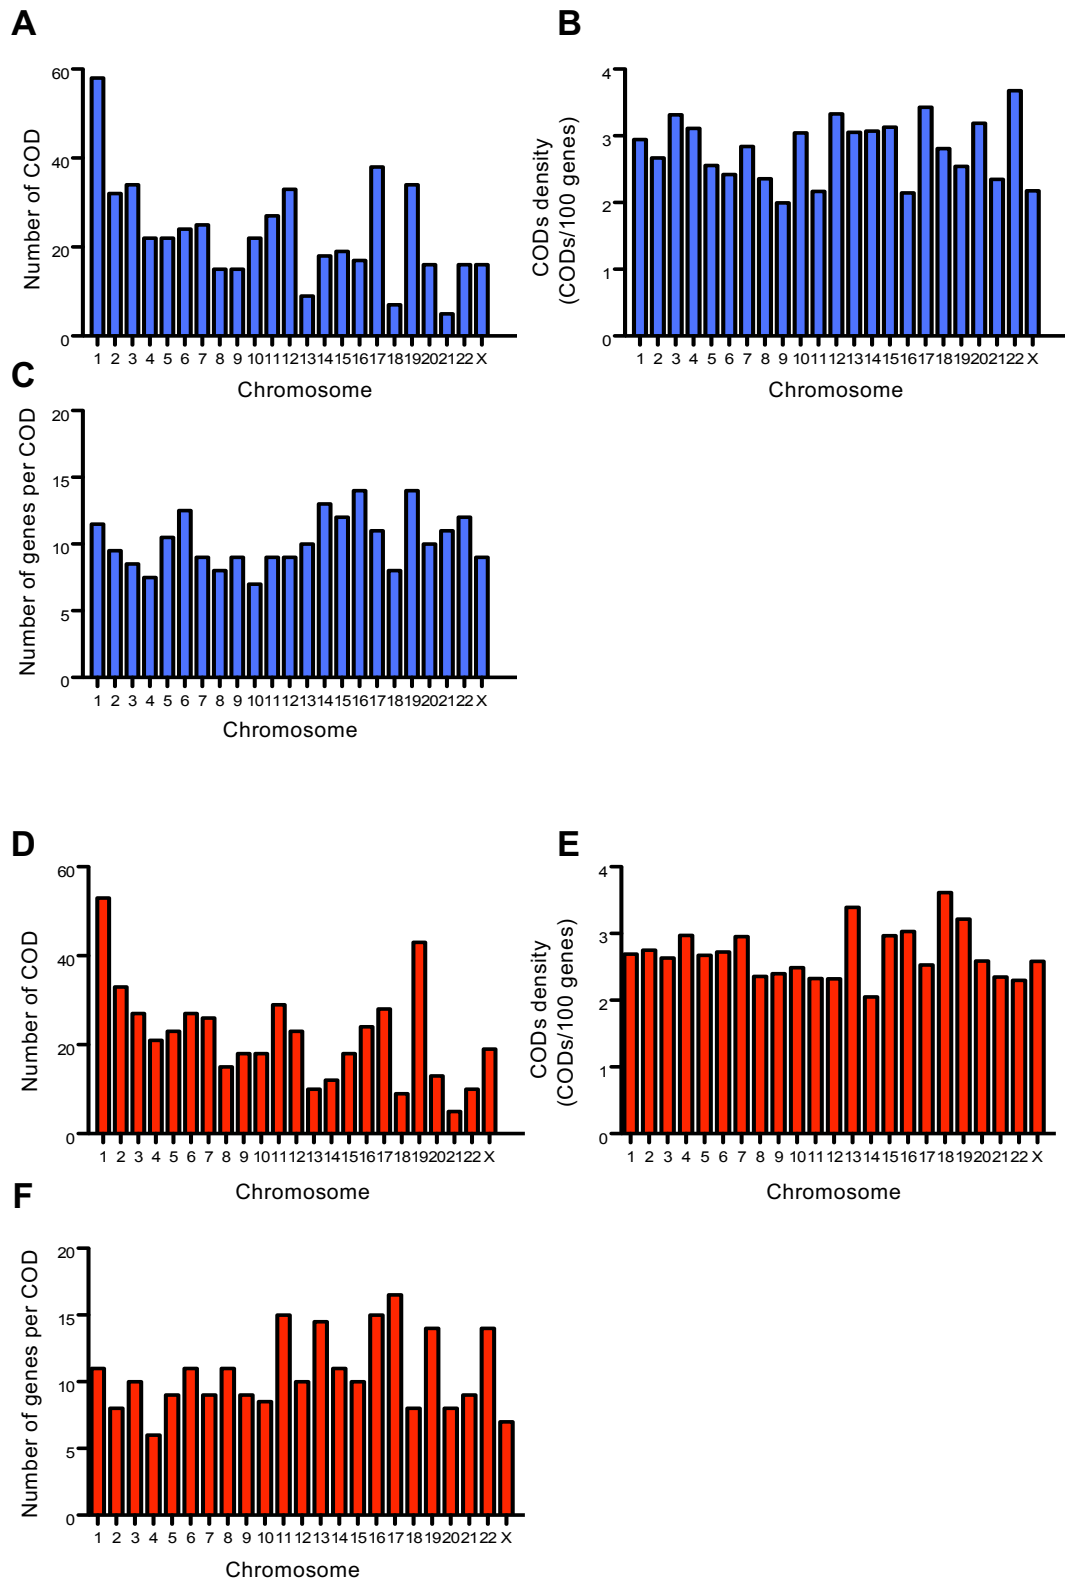

Supplement: pcbi.1005708.s004.pdf [file pcbi.1005708.s004.pdf]
