# Supplementary material for: Analysis of the relationship between coexpression domains and chromatin 3D organization
Source: PLoS Comput Biol. 2017 Sep 13;13(9):e1005708. doi: 10.1371/journal.pcbi.1005708 (PMC5612749; doi:10.1371/journal.pcbi.1005708)
Supplement: S2 Table — (XLSX) [file pcbi.1005708.s013.xlsx]

## Sheet: RIDGES.list
S2 Table: list of RIDGEs found gene expression levels from normal breast (see methods for details).
chr	RIDGES	Gene.start	bp.start	Gene.end	bp.end	length.bp	length	all.genes
1	1	RERE	8412463	CTNNBIP1	9970316	1557854	14	RERE,ENO1,CA6,SLC2A7,SLC2A5,GPR157,H6PD,SPSB1,SLC25A33,TMEM201,PIK3CD,C1orf200,CLSTN1,CTNNBIP1
1	2	LDLRAD2	22147942	NIPAL3	24781314	2633373	36	LDLRAD2,HSPG2,CELA3B,CELA3A,CDC42,WNT4,ZBTB40,EPHA8,C1QA,C1QC,C1QB,EPHB2,KDM1A,LUZP1,HTR1D,HNRNPR,ZNF436,C1orf213,TCEA3,ASAP3,E2F2,ID3,MDS2,RPL11,TCEB3,LYPLA2,GALE,HMGCL,FUCA1,CNR2,PNRC2,MYOM3,IL22RA1,LOC284632,GRHL3,NIPAL3
1	3	PLEKHO1	150121766	SCNM1	151140384	1018619	32	PLEKHO1,ANP32E,CA14,APH1A,C1orf54,C1orf51,MRPS21,PRPF3,RPRD2,TARS2,ECM1,ADAMTSL4,MCL1,ENSA,GOLPH3L,HORMAD1,CTSS,CTSK,ARNT,SETDB1,ANXA9,FAM63A,PRUNE,BNIPL,C1orf56,CDC42SE1,MLLT11,GABPB2,SEMA6C,TNFAIP8L2,LYSMD1,SCNM1
1	4	S100A2	153533584	SNORA42	155889833	2356250	72	S100A2,S100A16,S100A14,S100A13,S100A1,SNAPIN,ILF2,NPR1,INTS3,SLC27A3,GATAD2B,DENND4B,CRTC2,SLC39A1,CREB3L4,JTB,RAB13,RPS27,NUP210L,TPM3,C1orf189,C1orf43,UBAP2L,SNORA58,HAX1,AQP10,ATP8B2,IL6R,SHE,TDRD10,UBE2Q1,ADAR,KCNN3,PMVK,PBXIP1,PYGO2,SHC1,CKS1B,FLAD1,LENEP,ZBTB7B,DCST2,DCST1,ADAM15,EFNA3,EFNA4,EFNA1,DPM3,KRTCAP2,TRIM46,MUC1,THBS3,MTX1,GBAP1,GBA,FAM189B,SCAMP3,CLK2,HCN3,PKLR,FDPS,RUSC1,ASH1L,M…
1	5	PTPN7	202118978	ADIPOR1	202917557	798580	11	PTPN7,PTPRVP,LGR6,UBE2T,PPP1R12B,SYT2,KDM5B,LOC148709,RABIF,KLHL12,ADIPOR1
2	1	PAPOLG	60983364	GKN1	69208112	8224749	44	PAPOLG,REL,PUS10,PEX13,KIAA1841,C2orf74,AHSA2,USP34,SNORA70B,XPO1,FAM161A,CCT4,COMMD1,B3GNT2,TMEM17,EHBP1,LOC100132215,OTX1,MDH1,UGP2,VPS54,PELI1,AFTPH,SERTAD2,SLC1A4,CEP68,RAB1A,ACTR2,SPRED2,MEIS1,ETAA1,C1D,WDR92,PNO1,PPP3R1,CNRIP1,PLEK,FBXO48,APLF,PROKR1,ARHGAP25,BMP10,GKN2,GKN1
3	1	SRGAP3	9022275	TTLL3	9878040	855766	12	SRGAP3,THUMPD3,SETD5,LHFPL4,MTMR14,CPNE9,BRPF1,OGG1,CAMK1,TADA3,ARPC4,TTLL3
3	2	PRKAR2A	48785217	MST1	49726196	940980	27	PRKAR2A,SLC25A20,ARIH2,P4HTM,WDR6,DALRD3,NDUFAF3,IMPDH2,QRICH1,QARS,USP19,LAMB2,CCDC71,KLHDC8B,LOC646498,CCDC36,C3orf62,USP4,GPX1,RHOA,TCTA,AMT,NICN1,DAG1,BSN,APEH,MST1
3	3	PLOD2	145787227	TM4SF18	149051259	3264033	15	PLOD2,PLSCR4,PLSCR2,PLSCR1,PLSCR5,ZIC4,ZIC1,AGTR1,CPB1,CPA3,GYG1,HLTF,HPS3,CP,TM4SF18
3	4	FXR1	180630233	MAP6D1	183543393	2913161	13	FXR1,DNAJC19,SOX2,ATP11B,DCUN1D1,MCCC1,LAMP3,MCF2L2,B3GNT5,KLHL6,KLHL24,YEATS2,MAP6D1
4	1	CCNG2	78079449	PRDM8	81125482	3046034	12	CCNG2,CXCL13,CNOT6L,MRPL1,FRAS1,ANXA3,BMP2K,PAQR3,NAA11,GK2,ANTXR2,PRDM8
5	1	PAIP2	138677518	SLC4A9	139752463	1074946	14	PAIP2,SLC23A1,SPATA24,DNAJC18,ECSCR,TMEM173,UBE2D2,CXXC5,PSD2,NRG2,PURA,PFDN1,HBEGF,SLC4A9
5	2	CD74	149781199	ATOX1	151138210	1357012	20	CD74,RPS14,NDST1,SYNPO,MYOZ3,RBM22,DCTN4,IRGM,ZNF300,GPX3,TNIP1,ANXA6,CCDC69,GM2A,SLC36A3,SLC36A2,SLC36A1,FAT2,SPARC,ATOX1
6	1	SNORD52	31804852	GRM4	34031016	2226165	72	SNORD52,NEU1,SLC44A4,EHMT2,C2,ZBTB12,CFB,SKIV2L,DOM3Z,STK19,C4A,CYP21A2,TNXB,ATF6B,FKBPL,PRRT1,PPT2,EGFL8,AGPAT1,RNF5,AGER,PBX2,GPSM3,NOTCH4,C6orf10,BTNL2,HLA-DRA,HLA-DRB5,HLA-DRB1,HLA-DRB6,HLA-DQA1,HLA-DQB1,HLA-DQA2,HLA-DQB2,HLA-DOB,TAP2,PSMB8,TAP1,PSMB9,HLA-DMB,HLA-DMA,BRD2,HLA-DOA,HLA-DPA1,HLA-DPB1,HLA-DPB2,COL11A2,RXRB,SLC39A7,HSD17B8,RING1,VPS52,RPS18,B3GALT4,WDR46,PFDN6,RGL2,TAPBP,ZBTB22,DA…
7	1	C1GALT1	7222245	TMEM106B	12276890	5054646	12	C1GALT1,COL28A1,MIOS,RPA3,GLCCI1,ICA1,NXPH1,PER4,NDUFA4,PHF14,THSD7A,TMEM106B
7	2	PSMA2	42956461	H2AFV	44887725	1931265	27	PSMA2,MRPL32,HECW1,STK17A,BLVRA,MRPS24,URGCP,UBE2D4,POLR2J4,SPDYE1,DBNL,PGAM2,POLM,AEBP1,POLD2,MYL7,GCK,YKT6,CAMK2B,NUDCD3,NPC1L1,DDX56,TMED4,OGDH,ZMIZ2,PPIA,H2AFV
8	1	MTDH	98656406	ATP6V1C1	104085285	5428880	33	MTDH,LAPTM4B,MATN2,RPL30,SNORA72,C8orf47,HRSP12,POP1,NIPAL2,KCNS2,STK3,OSR2,VPS13B,COX6C,RGS22,FBXO43,POLR2K,SPAG1,RNF19A,ANKRD46,SNX31,PABPC1,YWHAZ,ZNF706,NACAP1,GRHL2,NCALD,RRM2B,UBR5,ODF1,KLF10,AZIN1,ATP6V1C1
9	1	AQP7	33384947	ENHO	34523037	1138091	19	AQP7,AQP3,NOL6,SUGT1P1,ANXA2P2,PTENP1,PRSS3,UBE2R2,UBAP2,SNORD121B,SNORD121A,DCAF12,UBAP1,KIF24,NUDT2,KIAA1161,C9orf24,DNAI1,ENHO
9	2	ST6GALNAC6	130647600	PPP2R4	131911225	1263626	40	ST6GALNAC6,ST6GALNAC4,PIP5KL1,DPM2,FAM102A,NAIF1,SLC25A25,PTGES2,LOC389791,LCN2,C9orf16,CIZ1,DNM1,GOLGA2,TRUB2,COQ4,SLC27A4,URM1,CERCAM,ODF2,GLE1,SPTAN1,WDR34,SET,PKN3,ZDHHC12,ZER1,TBC1D13,ENDOG,C9orf114,CCBL1,LRRC8A,PHYHD1,NUP188,DOLK,SH3GLB2,FAM73B,DOLPP1,CRAT,PPP2R4
10	1	C10orf54	73507313	COMTD1	76995770	3488458	42	C10orf54,PSAP,ANAPC16,CHST3,SPOCK2,ASCC1,DDIT4,DNAJB12,CBARA1,CCDC109A,OIT3,PLA2G12B,P4HA1,NUDT13,ECD,FAM149B1,DNAJC9,MRPS16,TTC18,ANXA7,PPP3CB,USP54,MYOZ1,SYNPO2L,AGAP5,BMS1P4,SEC24C,FUT11,CHCHD1,KIAA0913,NDST2,CAMK2G,C10orf55,PLAU,VCL,AP3M1,ADK,DUPD1,DUSP13,SAMD8,VDAC2,COMTD1
11	1	IPO7	9406168	RRAS2	14380031	4973864	29	IPO7,SNORA23,ZNF143,WEE1,SWAP70,SBF2,ADM,AMPD3,RNF141,LYVE1,MRVI1,CTR9,EIF4G2,SNORD97,ZBED5,USP47,DKK3,MICAL2,MICALCL,PARVA,TEAD1,SCARNA16,RASSF10,ARNTL,BTBD10,PTH,FAR1,SPON1,RRAS2
11	2	CSTF3	33106129	TTC17	43468067	10361939	28	CSTF3,HIPK3,CD59,FBXO3,LMO2,CAPRIN1,NAT10,ABTB2,CAT,ELF5,EHF,APIP,PDHX,CD44,SLC1A2,PAMR1,FJX1,TRIM44,LDLRAD3,COMMD9,PRR5L,TRAF6,RAG1,RAG2,C11orf74,LRRC4C,API5,TTC17
11	3	TM7SF2	64879325	DRAP1	65689048	809724	39	TM7SF2,ZNHIT2,FAU,MRPL49,SYVN1,SPDYC,CAPN1,SLC22A20,POLA2,CDC42EP2,DPF2,TIGD3,SLC25A45,FRMD8,NEAT1,MALAT1,SCYL1,LTBP3,SSSCA1,FAM89B,EHBP1L1,KCNK7,MAP3K11,PCNXL3,SIPA1,RELA,KAT5,RNASEH2C,OVOL1,SNX32,CFL1,MUS81,EFEMP2,CTSW,FIBP,CCDC85B,FOSL1,C11orf68,DRAP1
12	1	LPAR5	6728000	SCARNA12	7076769	348770	24	LPAR5,ACRBP,ING4,ZNF384,COPS7A,MLF2,PTMS,LAG3,CD4,GPR162,LEPREL2,GNB3,CDCA3,USP5,TPI1,SPSB2,RPL13P5,LRRC23,ENO2,ATN1,C12orf57,PTPN6,PHB2,SCARNA12
12	2	KIAA1467	13197314	H2AFJ	14930936	1733623	10	KIAA1467,GSG1,EMP1,C12orf36,GRIN2B,ATF7IP,PLBD1,GUCY2C,HIST4H4,H2AFJ
12	3	GDF11	56137063	IL23A	56734194	597132	28	GDF11,SARNP,DNAJC14,ORMDL2,MMP19,WIBG,DGKA,CDK2,RAB5B,SUOX,IKZF4,RPS26,ERBB3,PA2G4,RPL41,ZC3H10,ESYT1,MYL6B,MYL6,SMARCC2,RNF41,SLC39A5,ANKRD52,COQ10A,CS,CNPY2,PAN2,IL23A
12	4	C12orf76	110478982	ERP29	112461024	1982043	24	C12orf76,IFT81,ATP2A2,ANAPC7,ARPC3,GPN3,VPS29,RAD9B,PPTC7,TCTN1,HVCN1,PPP1CC,CCDC63,MYL2,CUX2,FAM109A,SH2B3,ATXN2,BRAP,ACAD10,ALDH2,MAPKAPK5,TMEM116,ERP29
12	5	CIT	120123594	POP5	121019201	895608	16	CIT,CCDC64,RAB35,GCN1L1,RPLP0,PXN,SIRT4,PLA2G1B,MSI1,COX6A1,TRIAP1,GATC,DYNLL1,COQ5,RNF10,POP5
12	6	ABCB9	123405497	DDX55	124104255	698759	14	ABCB9,OGFOD2,ARL6IP4,PITPNM2,MPHOSPH9,C12orf65,CDK2AP1,SBNO1,SETD8,RILPL2,SNRNP35,RILPL1,TMED2,DDX55
14	1	OXA1L	23235730	TSSK4	24677454	1441725	49	OXA1L,SLC7A7,MRPL52,MMP14,LRP10,REM2,RBM23,PRMT5,HAUS4,C14orf93,PSMB5,PSMB11,CDH24,ACIN1,C14orf119,CEBPE,SLC7A8,HOMEZ,PPP1R3E,BCL2L2,PABPN1,SLC22A17,EFS,IL25,CMTM5,MYH6,MYH7,NGDN,THTPA,AP1G2,JPH4,DHRS2,DHRS4,DHRS4L1,DHRS4L2,LRRC16B,CPNE6,NRL,PCK2,DCAF11,FITM1,PSME1,PSME2,RNF31,IRF9,REC8,IPO4,TM9SF1,TSSK4
14	2	ENTPD5	74424712	EIF2B2	75476294	1051583	15	ENTPD5,ALDH6A1,LIN52,VSX2,ABCD4,NPC2,ISCA2,LTBP2,FCF1,YLPM1,PROX2,DLST,RPS6KL1,PGF,EIF2B2
15	1	MGC15885	62929370	SNX1	64427153	1497784	14	MGC15885,TLN2,TPM1,LACTB,RPS27L,RAB8B,APH1B,CA12,USP3,FBXL22,HERC1,DAPK2,FAM96A,SNX1
16	1	LITAF	11641577	ABCC6P1	18609607	6968031	34	LITAF,SNN,TXNDC11,ZC3H7A,BCAR4,RSL1D1,GSPT1,TNFRSF17,SNX29,CPPED1,SHISA9,ERCC4,MKL2,PARN,BFAR,PLA2G10,ABCC6P2,NOMO1,NPIP,PDXDC1,NTAN1,RRN3,MPV17L,C16orf45,KIAA0430,NDE1,MYH11,ABCC1,ABCC6,NOMO3,XYLT1,LOC339047,NOMO2,ABCC6P1
16	2	HS3ST4	25703346	CCDC101	28603111	2899766	17	HS3ST4,C16orf82,NSMCE1,IL4R,IL21R,GTF3C1,KIAA0556,GSG1L,XPO6,SBK1,EIF3C,EIF3CL,CLN3,APOB48R,IL27,NUPR1,CCDC101
16	3	MMP2	55513080	MT1L	56652730	1139651	18	MMP2,LPCAT2,CAPNS2,SLC6A2,CES1,CES7,LOC283856,GNAO1,DKFZP434H168,AMFR,NUDT21,OGFOD1,BBS2,MT4,MT3,MT1A,MT2A,MT1L
16	4	ESRP2	68262449	DDX19A	70404288	2141840	31	ESRP2,PLA2G15,SLC7A6,SLC7A6OS,PRMT7,SMPD3,ZFP90,CDH3,CDH1,HAS3,CHTF8,CIRH1A,SNTB2,VPS4A,COG8,PDF,NIP7,TMED6,TERF2,CYB5B,NFAT5,NQO1,NOB1,WWP2,CLEC18C,CLEC18A,PDPR,EXOSC6,AARS,DDX19B,DDX19A
17	1	VMO1	4688579	PFN1	4852381	163803	10	VMO1,GLTPD2,PSMB6,PLD2,MINK1,C17orf107,GP1BA,SLC25A11,RNF167,PFN1
17	2	KLHL10	39994042	AARSD1	41116515	1122474	42	KLHL10,KLHL11,ACLY,TTC25,CNP,DNAJC7,NKIRAS2,DHX58,KAT2A,HSPB9,RAB5C,KCNH4,HCRT,GHDC,STAT5B,STAT5A,STAT3,PTRF,ATP6V0A1,NAGLU,HSD17B1,COASY,MLX,PSMC3IP,FAM134C,TUBG1,TUBG2,PLEKHH3,CCR10,CNTNAP1,EZH1,RAMP2,VPS25,WNK4,CCDC56,CNTD1,BECN1,PSME3,AOC2,AOC3,G6PC,AARSD1
17	3	COL1A1	48261456	ANKFN1	54560007	6298552	34	COL1A1,TMEM92,XYLT2,MRPL27,EME1,LRRC59,ACSF2,CHAD,RSAD1,MYCBPAP,EPN3,SPATA20,CACNA1G,ABCC3,ANKRD40,LUC7L3,WFIKKN2,TOB1,SPAG9,NME1,NME1-NME2,NME2,MBTD1,UTP18,CA10,KIF2B,TOM1L1,COX11,STXBP4,HLF,MMD,TMEM100,PCTP,ANKFN1
18	1	ARHGAP28	6788492	GNAL	11885683	5097192	17	ARHGAP28,LAMA1,LRRC30,PTPRM,LOC100192426,RAB12,NDUFV2,ANKRD12,TWSG1,RALBP1,PPP4R1,RAB31,TXNDC2,VAPA,APCDD1,NAPG,GNAL
19	1	RPS15	1438362	SCAMP4	1920327	481966	16	RPS15,APC2,C19orf25,PCSK4,REEP6,ADAMTSL5,MEX3D,MBD3,UQCR11,TCF3,ONECUT3,ATP8B3,REXO1,KLF16,ADAT3,SCAMP4
20	1	NCOA6	33326701	MANBAL	35945663	2618963	38	NCOA6,GGT7,ACSS2,GSS,MYH7B,TRPC4AP,EDEM2,PROCR,MMP24,EIF6,FAM83C,UQCC,GDF5,CEP250,C20orf173,ERGIC3,FER1L4,SPAG4,CPNE1,RBM12,NFS1,ROMO1,RBM39,PHF20,SCAND1,EPB41L1,DLGAP4,MYL9,TGIF2,C20orf24,SLA2,NDRG3,DSN1,SAMHD1,RBL1,RPN2,GHRH,MANBAL
20	2	EYA2	45606873	CEBPB	48809227	3202355	25	EYA2,ZMYND8,LOC100131496,NCOA3,SULF2,PREX1,ARFGEF2,CSE1L,STAU1,DDX27,ZNFX1,SNORD12C,SNORD12B,SNORD12,KCNB1,PTGIS,B4GALT5,SLC9A8,SPATA2,RNF114,SNAI1,TMEM189-UBE2V1,UBE2V1,TMEM189,CEBPB
21	1	ITSN1	35014783	HLCS	38338956	3324174	18	ITSN1,ATP5O,MRPS6,SLC5A3,KCNE2,KCNE1,RCAN1,CLIC6,RUNX1,SETD4,CBR1,CBR3,DOPEY2,MORC3,CHAF1B,CLDN14,SIM2,HLCS
22	1	SUN2	39130718	NDUFA6	42486888	3356171	59	SUN2,DNAL4,NPTXR,CBX6,APOBEC3A,APOBEC3B,APOBEC3C,APOBEC3D,APOBEC3F,APOBEC3G,APOBEC3H,CBX7,PDGFB,RPL3,SNORD43,SYNGR1,TAB1,MGAT3,SMCR7L,ATF4,RPS19BP1,CACNA1I,ENTHD1,GRAP2,FAM83F,TNRC6B,ADSL,SGSM3,MKL1,SLC25A17,ST13,XPNPEP3,DNAJB7,RBX1,EP300,L3MBTL2,CHADL,RANGAP1,ZC3H7B,TEF,TOB2,PHF5A,ACO2,POLR3H,CSDC2,PMM1,XRCC6,NHP2L1,C22orf46,MEI1,CCDC134,SREBF2,TNFRSF13C,CENPM,sep-03,WBP2NL,NAGA,FAM109B,NDUFA6
